# Supplementary material for: Polθ is phosphorylated by PLK1 to repair double-strand breaks in mitosis
Source: PubMed Central journal article supplement (PMC10499603; doi:10.1038/s41586-023-06506-6), 2023-09-06
Supplement: 41586_2023_6506_MOESM6_ESM.pdf [file 41586_2023_6506_MOESM6_ESM.pdf]

| <b>Design-based Quantification of Phospho-sites</b> |                                                                                                                                                                                                                                                                                   |                                                                                                                                                                                                                                                       |
|-----------------------------------------------------|-----------------------------------------------------------------------------------------------------------------------------------------------------------------------------------------------------------------------------------------------------------------------------------|-------------------------------------------------------------------------------------------------------------------------------------------------------------------------------------------------------------------------------------------------------|
| <b>Source</b>                                       |                                                                                                                                                                                                                                                                                   |                                                                                                                                                                                                                                                       |
| <b>Name :</b>                                       | Phosphos - Noco 500mM/Volacertib 500mM - Norm all                                                                                                                                                                                                                                 |                                                                                                                                                                                                                                                       |
| <b>Location in myProMS :</b>                        | Camille Gelot > Phospho POLQ label free quantifi > Label Free Quantification                                                                                                                                                                                                      |                                                                                                                                                                                                                                                       |
| <b>Design level :</b>                               | Experiment                                                                                                                                                                                                                                                                        |                                                                                                                                                                                                                                                       |
| <b>Peptide XIC extraction engine :</b>              | MassChroQ (v2.2.21)                                                                                                                                                                                                                                                               |                                                                                                                                                                                                                                                       |
| <b>Labeling :</b>                                   | Label-free                                                                                                                                                                                                                                                                        |                                                                                                                                                                                                                                                       |
| <b>Quantification parameters</b>                    |                                                                                                                                                                                                                                                                                   |                                                                                                                                                                                                                                                       |
| <b>Quantification method :</b>                      | Protein ratio based on peptide intensity [Simple ratios - Software: myProMS-Quant v3.7]                                                                                                                                                                                           |                                                                                                                                                                                                                                                       |
| <b>State #1 :</b>                                   | Volasertib - IP 500mM NaCl: 5 bio. rep. / 5 observations                                                                                                                                                                                                                          | <ul style="list-style-type: none"> <li>•X5134FD : XIC extraction 500mM</li> <li>•X5136FD : XIC extraction 500mM</li> <li>•X5138FD : XIC extraction 500mM</li> <li>•X5140FD : XIC extraction 500mM</li> <li>•X5142FD : XIC extraction 500mM</li> </ul> |
| <b>State #2 :</b>                                   | Nocodazole - IP 500mM NaCl: 5 bio. rep. / 5 observations                                                                                                                                                                                                                          | <ul style="list-style-type: none"> <li>•X5133FD : XIC extraction 500mM</li> <li>•X5135FD : XIC extraction 500mM</li> <li>•X5137FD : XIC extraction 500mM</li> <li>•X5139FD : XIC extraction 500mM</li> <li>•X5141FD : XIC extraction 500mM</li> </ul> |
| <b>Peptide selection :</b>                          | <ul style="list-style-type: none"> <li>•Proteotypic peptides only.</li> <li>•Missed cleavage allowed.</li> <li>•No modifications allowed.</li> <li>•All charge states.</li> <li>•All sources.</li> <li>•Phospho-sites positions are confirmed if PhosphoRS probability</li> </ul> |                                                                                                                                                                                                                                                       |
| <b>Protein selection :</b>                          | All visible proteins                                                                                                                                                                                                                                                              |                                                                                                                                                                                                                                                       |
| <b>Bias correction :</b>                            | Median & Scale at peptide level                                                                                                                                                                                                                                                   |                                                                                                                                                                                                                                                       |
| <b>Infinite ratios :</b>                            | Not avoided                                                                                                                                                                                                                                                                       |                                                                                                                                                                                                                                                       |
| <b>Created :</b>                                    | Florent Dingli                                                                                                                                                                                                                                                                    |                                                                                                                                                                                                                                                       |
| <b>Export settings</b>                              |                                                                                                                                                                                                                                                                                   |                                                                                                                                                                                                                                                       |
| <b>Ratios exported :</b>                            | •Nocodazole - IP 500mM NaCl/Volacertib - IP 500mM NaCl                                                                                                                                                                                                                            |                                                                                                                                                                                                                                                       |
| <b>Fold change <math>\geq</math></b>                | 1.5 (INF=1000)                                                                                                                                                                                                                                                                    |                                                                                                                                                                                                                                                       |
| <b>Adj. p-value <math>\leq</math></b>               | 1 (+/-INF allowed)                                                                                                                                                                                                                                                                |                                                                                                                                                                                                                                                       |
| <b>Coefficient of variation <math>\leq</math></b>   | *No filter*                                                                                                                                                                                                                                                                       |                                                                                                                                                                                                                                                       |
| <b>Peptides used for ratio <math>\geq</math></b>    | 1                                                                                                                                                                                                                                                                                 |                                                                                                                                                                                                                                                       |
| <b>Restrict to proteins in List :</b>               | POLQ > POLQ                                                                                                                                                                                                                                                                       |                                                                                                                                                                                                                                                       |

| 6/22 sites<br>1/1 proteins                                               | Gene &<br>Synonyms | Nocodazole - IP 500mM NaCl/Volasertib - IP 500mM |                 |                  |      |                        |            | Total<br>peptides<br>in set | MW<br>(kDa) | Description          | Species      |
|--------------------------------------------------------------------------|--------------------|--------------------------------------------------|-----------------|------------------|------|------------------------|------------|-----------------------------|-------------|----------------------|--------------|
|                                                                          |                    | Ratio                                            | Log2<br>(Ratio) | Adj. p-<br>value | CV % | Dist.<br>pept.<br>used | Pept. used |                             |             |                      |              |
| O75417-Phospho:S1628.S1639                                               | POLQ,POLH          | 5,417754                                         | 2,4377          |                  |      | 1                      | 6          | 6                           | 289,6       | DNA polymerase theta | Homo sapiens |
| O75417-Phospho:S1289                                                     | POLQ,POLH          | 3,904248                                         | 1,965           | 0,400471         | 73,9 | 1                      | 6          | 8                           | 289,6       | DNA polymerase theta | Homo sapiens |
| O75417-Phospho:T1755                                                     | POLQ,POLH          | 3,242029                                         | 1,6969          | 0,06346          | 26,9 | 1                      | 7          | 8                           | 289,6       | DNA polymerase theta | Homo sapiens |
| O75417-Phospho:S1094*                                                    | POLQ,POLH          | 1,958174                                         | 0,9695          | 0,053612         | 28,4 | 1                      | 9          | 10                          | 289,6       | DNA polymerase theta | Homo sapiens |
| O75417-Phospho:S1594                                                     | POLQ,POLH          | 1,900643                                         | 0,9265          | 0,001049         | 18,5 | 2                      | 24         | 33                          | 289,6       | DNA polymerase theta | Homo sapiens |
| O75417-Phospho:S1436*                                                    | POLQ,POLH          | 1,887173                                         | 0,9162          | 0,115005         | 38,9 | 1                      | 10         | 10                          | 289,6       | DNA polymerase theta | Homo sapiens |
| * Quantified only with re-extracted peptides by Match Between Runs (MBR) |                    |                                                  |                 |                  |      |                        |            |                             |             |                      |              |
| Table 4                                                                  |                    |                                                  |                 |                  |      |                        |            |                             |             |                      |              |
