# Supplementary material for: Polθ is phosphorylated by PLK1 to repair double-strand breaks in mitosis
Source: PubMed Central journal article supplement (PMC10499603; doi:10.1038/s41586-023-06506-6), 2023-09-06
Supplement: 41586_2023_6506_MOESM7_ESM.pdf [file 41586_2023_6506_MOESM7_ESM.pdf]

**PLK1 phosphorylation sites on Polθ**

| Amino acid position on Polθ | Predicted to be phosphorylated by PLK1 | Phosphorylation motif [D,N,E]-X-[S,T] (elm.eu.org) | Conservation score | Detected by quantitative MS | Detected by NMR | Mutated in 10A-Polθ | Mutated in 4A- and 4D- Polθ |
|-----------------------------|----------------------------------------|----------------------------------------------------|--------------------|-----------------------------|-----------------|---------------------|-----------------------------|
| S1289                       | Yes                                    | LNISRLQ                                            | 0                  | Yes                         | Not tested      | Yes                 | -                           |
| S1321                       | Yes                                    | FEDSFYL                                            | 4                  | -                           | Not tested      | -                   | -                           |
| S1436                       | Yes                                    | NEVSVTD                                            | 4                  | Yes (*)                     | -               | -                   | -                           |
| S1444                       | -                                      |                                                    | 2                  | -                           | Yes (**)        | -                   | -                           |
| S1482                       | Yes                                    | PETSLNM                                            | 3                  | N.A                         | Yes             | Yes                 | Yes                         |
| S1486                       | -                                      |                                                    | 4                  | N.A                         | Yes             | Yes                 | Yes                         |
| S1488                       | -                                      |                                                    | 2                  | N.A                         | Yes             | Yes                 | Yes                         |
| S1493                       | -                                      |                                                    | 4                  | N.A                         | Yes             | Yes                 | Yes                         |
| S1551                       | -                                      |                                                    | 0                  | N.A                         | Yes (**)        | -                   | -                           |
| S1555                       | Yes                                    | NDESIIF                                            | 3                  | N.A                         | Yes             | Yes                 | -                           |
| S1563                       | -                                      |                                                    | 2                  | -                           | Yes             | Yes                 | -                           |
| T1584                       | Yes                                    | KNHTVVS                                            | 0                  | -                           | Yes (**)        | -                   | -                           |
| S1594                       | -                                      |                                                    | 0                  | Yes                         | -               | -                   | -                           |
| S1628                       | Yes                                    | QNHSEFIW                                           | 1                  | Yes                         | Yes             | Yes                 | -                           |
| S1635                       | -                                      |                                                    | 3                  | -                           | Yes             | Yes                 | -                           |
| S1639                       | -                                      |                                                    | 4                  | Yes                         | -               | -                   | -                           |
| T1755                       | -                                      |                                                    | 1                  | Yes                         | Not tested      | Yes                 | -                           |

Conservation score  
 0 = Non conserved  
 1 = Mammals only  
 2 = Mammals + Xenops/frogs  
 3 = Mammals > Birds  
 4 = Mammals > Fishes  
 - = No  
 N.A: Not available  
 \* Quantified only with re-extracted peptides by Match Between Runs (MBR)  
 \*\* Quantified only after > 5 hours incubation with PLK1. Signal < 80% phosphorylation
