# Supplementary material for: Polθ is phosphorylated by PLK1 to repair double-strand breaks in mitosis
Source: PubMed Central journal article supplement (PMC10499603; doi:10.1038/s41586-023-06506-6), 2023-09-06
Supplement: 41586_2023_6506_MOESM8_ESM.pdf [file 41586_2023_6506_MOESM8_ESM.pdf]

## Design-based Quantification of Proteins

| Source                                            |                                                                                                                                                                                                                                                                                  |
|---------------------------------------------------|----------------------------------------------------------------------------------------------------------------------------------------------------------------------------------------------------------------------------------------------------------------------------------|
| <b>Name :</b>                                     | F1P/F1                                                                                                                                                                                                                                                                           |
| <b>Location in myProMS :</b>                      | Camille Gelot > 06/12/2022 - Partners of Phospho POLQ - Quantif > Label Free Quantification                                                                                                                                                                                      |
| <b>Design level :</b>                             | Experiment                                                                                                                                                                                                                                                                       |
| <b>Peptide XIC extraction engine :</b>            | MassChroQ (v2.2.21)                                                                                                                                                                                                                                                              |
| <b>Labeling :</b>                                 | Label-free                                                                                                                                                                                                                                                                       |
| Quantification parameters                         |                                                                                                                                                                                                                                                                                  |
| <b>Quantification method :</b>                    | Protein ratio based on peptide intensity [Simple ratios - Matching topN peptides - Software: myProMS-Quant v3.8]                                                                                                                                                                 |
| <b>State #1 :</b>                                 | F1: 5 bio. rep. / 5 observations<br><ul style="list-style-type: none"> <li>•E0981FD : XIC extraction all</li> <li>•E0984FD : XIC extraction all</li> <li>•E0987FD : XIC extraction all</li> <li>•E0990FD : XIC extraction all</li> <li>•E0993FD : XIC extraction all</li> </ul>  |
| <b>State #2 :</b>                                 | F1P: 5 bio. rep. / 5 observations<br><ul style="list-style-type: none"> <li>•E0982FD : XIC extraction all</li> <li>•E0985FD : XIC extraction all</li> <li>•E0988FD : XIC extraction all</li> <li>•E0991FD : XIC extraction all</li> <li>•E0994FD : XIC extraction all</li> </ul> |
| <b>Peptide selection :</b>                        | <ul style="list-style-type: none"> <li>•Proteotypic peptides only.</li> <li>•Missed cleavage allowed.</li> <li>•No modifications allowed.</li> <li>•All charge states.</li> <li>•All sources.</li> </ul>                                                                         |
| <b>Protein selection :</b>                        | All visible proteins                                                                                                                                                                                                                                                             |
| <b>Bias correction :</b>                          | Median & Scale at peptide level                                                                                                                                                                                                                                                  |
| <b>Infinite ratios :</b>                          | Not avoided                                                                                                                                                                                                                                                                      |
| <b>Created :</b>                                  | 07/12/2022 09:58:29 by Florent Dingli                                                                                                                                                                                                                                            |
| Export settings                                   |                                                                                                                                                                                                                                                                                  |
| <b>Ratios exported :</b>                          | •F1P/F1                                                                                                                                                                                                                                                                          |
| <b>Fold change <math>\geq</math></b>              | 2 (INF=1000)                                                                                                                                                                                                                                                                     |
| <b>Adj. p-value <math>\leq</math></b>             | *User selection*                                                                                                                                                                                                                                                                 |
| <b>Coefficient of variation <math>\leq</math></b> | *User selection*                                                                                                                                                                                                                                                                 |
| <b>Peptides used for ratio <math>\geq</math></b>  | 3                                                                                                                                                                                                                                                                                |
| <b>Sort by :</b>                                  | Peptides used                                                                                                                                                                                                                                                                    |
| <b>Restrict to proteins in List :</b>             | Dam > Up in F1P & F1 /beads >3 5PD 5rep                                                                                                                                                                                                                                          |

| 25/72 proteins | Gene & Synonyms             | F1P/F1   |             |              |          |                  |            | Total peptides in set | MW (kDa) | Description                                              | Species      |
|----------------|-----------------------------|----------|-------------|--------------|----------|------------------|------------|-----------------------|----------|----------------------------------------------------------|--------------|
|                |                             | Ratio    | Log2(Ratio) | Adj. p-value | CV %     | Dist. pept. used | Pept. used |                       |          |                                                          |              |
| P53621         | COPA                        | 2,310036 | 1,207915    | 5,94E-59     | 5,457941 | 67               | 809        | 999                   | 138,3    | Coatamer subunit alpha                                   | Homo sapiens |
| P46940         | IQGAP1,KIAA0051             | 8,673016 | 3,116534    | 5,1E-184     | 2,339064 | 75               | 722        | 1042                  | 189,3    | Ras GTPase-activating-like protein IQGAP1                | Homo sapiens |
| P12270         | TPR                         | 7,377798 | 2,88319     | 8E-120       | 3,122108 | 66               | 580        | 1107                  | 267,3    | Nucleoprotein TPR                                        | Homo sapiens |
| O75165         | DNAJC13,KIAA0678,RME8       | 3,662649 | 1,872887    | 1,76E-52     | 5,286823 | 51               | 404        | 586                   | 254,4    | DnaJ homolog subfamily C member 13                       | Homo sapiens |
| Q14789         | GOLGB1                      | 6,535571 | 2,708313    | 9,91E-93     | 3,317698 | 46               | 380        | 806                   | 376,0    | Golgin subfamily B member 1                              | Homo sapiens |
| Q9Y4P3         | TBL2,WBSCR13,UNQ563/PRO1125 | 2,005983 | 1,004309    | 4,77E-16     | 10,86294 | 27               | 302        | 404                   | 49,8     | Transducin beta-like protein 2                           | Homo sapiens |
| Q9Y305         | ACOT9,CGI-16                | 2,397907 | 1,261775    | 3,87E-17     | 10,13246 | 23               | 223        | 276                   | 49,9     | Acyl-coenzyme A thioesterase 9, mitochondrial            | Homo sapiens |
| O15078         | CEP290,BBS14,KIAA0373,NPHP6 | 2,573007 | 1,363455    | 1,92E-18     | 9,507075 | 34               | 203        | 372                   | 290,4    | Centrosomal protein of 290 kDa                           | Homo sapiens |
| P83111         | LACTB,MRPL56,UNQ843/PRO1781 | 4,509831 | 2,173073    | 8,16E-44     | 5,014934 | 21               | 198        | 257                   | 60,7     | Serine beta-lactamase-like protein LACTB, mitochondrial  | Homo sapiens |
| Q9P1Y5         | CAMSAP3,KIAA1543            | 3,322523 | 1,732279    | 2,44E-21     | 8,607837 | 25               | 196        | 277                   | 134,8    | Calmodulin-regulated spectrin-associated protein 3       | Homo sapiens |
| Q13769         | THOC5,C22orf19,KIAA0983     | 7,783691 | 2,960455    | 2,46E-50     | 4,305671 | 23               | 187        | 316                   | 78,5     | THO complex subunit 5 homolog                            | Homo sapiens |
| Q9P0L0         | VAPA,VAP33                  | 3,44386  | 1,784027    | 1,1E-20      | 8,738599 | 10               | 183        | 208                   | 27,9     | Vesicle-associated membrane protein-associated protein A | Homo sapiens |
| Q92547         | TOPBP1,KIAA0259             | 2,596899 | 1,37679     | 1,92E-18     | 9,335861 | 21               | 175        | 313                   | 170,7    | DNA topoisomerase 2-binding protein 1                    | Homo sapiens |
| Q96FV9         | THOC1,HPR1                  | 4,356188 | 2,123066    | 4,96E-27     | 6,958328 | 15               | 159        | 272                   | 75,7     | THO complex subunit 1                                    | Homo sapiens |
| Q13393         | PLD1                        | 4,57721  | 2,194468    | 1,66E-22     | 7,865281 | 22               | 152        | 294                   | 124,2    | Phospholipase D1                                         | Homo sapiens |
| O14579         | COPE                        | 2,628099 | 1,39402     | 1,82E-16     | 9,696928 | 10               | 133        | 165                   | 34,5     | Coatamer subunit epsilon                                 | Homo sapiens |
| Q9UBH6         | XPR1,SYG1_XR                | 2,369075 | 1,244324    | 4,76E-18     | 8,380219 | 7                | 95         | 98                    | 81,5     | Xenotropic and polytropic retrovirus receptor 1          | Homo sapiens |
| Q13190         | STX5,STX5A                  | 2,080326 | 1,05681     | 1,54E-09     | 13,35044 | 8                | 92         | 121                   | 39,7     | Syntaxin-5                                               | Homo sapiens |
| Q9Y6X9         | MORC2,KIAA0852,ZCWCC1       | 3,695243 | 1,885669    | 1,66E-13     | 10,2495  | 13               | 90         | 129                   | 117,8    | ATPase MORC2                                             | Homo sapiens |
| Q86W42         | THOC6,WDR58,PSEC0006        | 8,64146  | 3,111275    | 3,31E-19     | 7,04894  | 10               | 74         | 114                   | 37,5     | THO complex subunit 6 homolog                            | Homo sapiens |
| O75528         | TADA3,ADA3,TADA3L           | 2,407508 | 1,267541    | 5,62E-06     | 17,82711 | 8                | 68         | 82                    | 48,9     | Transcriptional adapter 3                                | Homo sapiens |
| Q96J01         | THOC3                       | 2,258921 | 1,175634    | 7,36E-05     | 20,40859 | 6                | 60         | 119                   | 38,8     | THO complex subunit 3                                    | Homo sapiens |
| Q4VC44         | FLYWCH1,KIAA1552            | 8,956446 | 3,162926    | 1,38E-27     | 4,053471 | 7                | 59         | 96                    | 80,1     | FLYWCH-type zinc finger-containing protein 1             | Homo sapiens |
| P57772         | EEFSEC,SELB                 | 7,530191 | 2,912686    | 5,16E-18     | 5,846612 | 5                | 46         | 112                   | 65,3     | Selenocysteine-specific elongation factor                | Homo sapiens |
| Q9Y485         | DMXL1,XL1                   | 6,878255 | 2,782043    | 3,86E-08     | 8,526515 | 3                | 21         | 182                   | 337,8    | DmX-like protein 1                                       | Homo sapiens |
