# Supplementary material for: Polθ is phosphorylated by PLK1 to repair double-strand breaks in mitosis
Source: Nature. 2023 Sep 6;621(7978):415–22. doi: 10.1038/s41586-023-06506-6 (PMC10499603; doi:10.1038/s41586-023-06506-6)
Supplement: Supplementary file 3 — List of positive hits from the siRNA screen for Polθ foci formation. Hits with a |RZ score| >2 are shown. Final values in the hit table (Table 1) correspond to the median RZ score of the three siRNAs. [file 41586_2023_6506_MOESM3_ESM.xlsx]

## Sheet: Hitlist
Outlier	Robust z score_corrected_transformed_Cell Count	Robust z score_corrected_Cells multi-foci_MultiFoci (%)	Toxicity threshold
366	164 + 0	228 + 1
brca2-ctrl		-6.49991
fancd2-ctrl	-5.00673	-7.14018	Toxic
bard1	-4.37456	-7.02067
brca1	-2.34947	-6.76102
polq		-6.36495
swi5		-6.06544
rad51		-5.9403
cdip1	-3.7047	-5.87345
bcl3	-2.87281	-5.86571
brca2		-5.78571
inip	-3.94539	-5.70406
tfap4	-3.80809	-5.41434
apbb1		-5.36965
smarcal1	-2.79189	-5.32957
swsap1	-2.94962	-5.32481
gtf2h2	-2.58346	-5.31139
rad17		-5.29886
zswim7	-2.8019	-5.24511
rps3	-4.94041	-5.21203
psma5	-4.43946	-5.16975
rpa1	-4.06495	-5.09144
polr2g	-4.32176	-5.07627
shfm1		-4.99035
apex2	-4.60774	-4.97722
zbtb32	-2.93484	-4.9411
st20		-4.86791
sfpq	-3.72044	-4.79156
polm	-3.45913	-4.72484
ercc1		-4.69025
pold3		-4.68435
spdya		-4.67206
pmaip1		-4.6475
slx1b	-4.00106	-4.60487
psmb7	-3.81185	-4.58325
whsc1		-4.55474
timeless	-4.47846	-4.54842
palb2		-4.52682
atrip	-3.36312	-4.49003
psma3	-4.76562	-4.45637
znf385a	-2.14487	-4.44346
psma7	-4.34591	-4.4287
rad51c		-4.42199
atr		-4.41806
psmd4	-2.51527	-4.37136
wac	-2.17697	-4.36738
fign		-4.34952
smarcad1	-2.46491	-4.30965
eya3	-3.44721	-4.27747
yap1		-4.24608
psmd9	-3.5384	-4.21608
brcc3	-3.41766	-4.16015
zbtb4		-4.14506
psma6	-4.97701	-4.14043
taf1	-2.2752	-4.12717
ak6		-4.11621
xab2	-4.8439	-4.11263
parp4		-4.10387
atxn3	-3.74801	-4.08858
xpc		-4.07964
macrod1	-2.11098	-4.06858
psma2	-2.94152	-4.06303
psmb5	-3.22594	-4.05323
fanca	-2.11503	-4.04865
ercc2		-3.99949
recql5	-3.55365	-3.98703
ercc5		-3.97997
apitd1		-3.97438
ccdc155	-3.0212	-3.95524
vcp	-3.57702	-3.92877
nipbl	-3.22515	-3.85883
fancg	-2.40271	-3.85471
fancc	-2.83295	-3.83251
irf3	-3.29336	-3.82544
usp47		-3.81809
psme4	-3.85634	-3.7966
psmb1	-3.04385	-3.74737
zbtb40		-3.72612
psmb4		-3.71856
rbbp8	-2.01848	-3.68655
rhno1		-3.6745
ercc6l2	-2.40742	-3.67073
ercc8	-2.20585	-3.6704
mapk14	-2.6745	-3.64839
tp73	-3.7683	-3.63625
ints7		-3.62913
setmar	-2.12041	-3.61679
kiaa2022	-2.17672	-3.54938
ccnk		-3.52598
bax	-2.74692	-3.48518
c1orf86	-2.11205	-3.48466
casp3	-2.12322	-3.46411
rfc5		-3.43386
myc	-2.61595	-3.38941
psmb2	-2.11985	-3.38898
mapk3	-2.97969	-3.37436
xrcc6		-3.37112
poln		-3.37028
nabp1	-2.2795	-3.36976
gtf2h1	-3.33467	-3.36797
babam1	-3.22782	-3.34922
vav3	-2.77313	-3.33384
tex12	-2.75157	-3.32879
cdk5rap3	-2.07421	-3.30121
fto		-3.26076
hic1	-3.03524	-3.25745
bag6	-3.08264	-3.23624
0 (Alias Zak)	-2.10635	-3.23575
fbxo31		-3.23049
gtf2h5	-3.53961	-3.1881
wdr33		-3.17753
msh5		-3.1314
polr2l		-3.10744
fancm	-2.54875	-3.09771
trip13		-3.08963
uvssa	-3.8812	-3.07461
nfatc2		-3.06532
pold1	-2.50028	-3.05582
skil	-2.56395	-3.02117
polr2k		-3.01614
rpa3		-3.00836
hus1		-2.95935
macrod2	-2.13273	-2.95747
gtf2h4	-2.29287	-2.94936
hinfp	-2.37107	-2.9485
gen1		-2.94592
nek4		-2.88571
tiprl		-2.86131
rad51d	-2.76254	-2.85406
alkbh3	-2.01961	-2.85055
rpa2		-2.84001
ppp1r15a	-2.33948	-2.79509
mapk1		-2.77298
sprtn	-2.15239	-2.76518
uba52	-4.04479	-2.75123
otub1		-2.74338
thoc5	-2.09939	-2.73341
polg		-2.72836
parg	-3.69227	-2.71833
kiaa0247		-2.69404
rfwd2		-2.6883
polr2c	-2.14936	-2.64955
pold4		-2.64598
spred2	-2.46296	-2.64563
trex2	-2.53271	-2.61729
ap5z1	-2.38607	-2.61366
psme1	-2.03227	-2.6117
alkbh8		-2.589
ube2v2		-2.58047
bcl2l2	-2.46353	-2.57162
psen1		-2.57153
ascc3		-2.54733
gadd45a		-2.54409
pcna	-4.25556	-2.54393
chd1l	-3.91028	-2.5399
nudt1		-2.5392
mdm4		-2.51541
ccng1	-2.3576	-2.51514
rnf8		-2.49612
ercc6		-2.49502
fancl		-2.46671
abl1		-2.46231
triap1		-2.46155
psma8		-2.44395
dclre1c	-4.1094	-2.41933
mdc1		-2.41592
rpa4		-2.4091
ddx39b	-2.96985	-2.38373
helq		-2.37741
bok		-2.37278
dclre1a		-2.37012
apitd1-cort		-2.35918
bclaf1	-2.09334	-2.33579
zranb3		-2.33498
polk	-3.05641	-2.32424
msh6	-2.20613	-2.31813
trex1	-2.2702	-2.31478
sox4		-2.31453
sod2	-2.05257	-2.30941
prpf19		-2.3004
tmem161a		-2.29437
uba1	-2.25326	-2.29129
rad23a		-2.29011
bivm-ercc5		-2.28956
fbxo6		-2.28938
usp28		-2.28598
psmb8		-2.28509
stra13		-2.28205
bad		-2.28097
kiaa0146		-2.25764
fbxo45		-2.25194
polr2j	-2.27085	-2.24974
cul4b	-3.34141	-2.24725
ier3		-2.24725
cetn2		-2.24692
smc6		-2.24544
hltf		-2.24036
sycp1		-2.23804
smc1a	-2.79577	-2.23646
tlk2	-2.76738	-2.22639
dmap1		-2.21198
mapkapk2	-2.15882	-2.19324
lig4		-2.18337
ctla4		-2.17722
usp16	-2.74007	-2.16928
rad52		-2.16049
dclre1b	-2.57136	-2.1477
ddit3	-2.61954	-2.14495
ercc3		-2.14389
mplkip	-2.22096	-2.13387
brsk1	-2.32539	-2.12133
psmd13		-2.10993
cdk7		-2.10343
tdg	-2.88494	-2.0975
tpt1		-2.09182
baz1b	-2.64808	-2.0903
gtf2h3	-2.79643	-2.08883
bcl2l10		-2.07768
thoc1		-2.07732
brd4	-4.95215	-2.06558
twist1		-2.05189
zmat3		-2.04595
rpain		-2.03984
irf7		-2.03161
polr2i	-3.457	-2.03085
ncoa6		-2.02772
cideb		-2.02622
pea15		-2.02109
taok2		-2.01553
stxbp4	-4.71312	-2.0131
chek2	-3.18268	-2.00444
apc		2.5637
tp53bp1	-2.80918
rnf168
yy1
ube2nl
eme1	-3.16854
suv39h1
rfc3
rec8
fnip2
rad54b
mnda
ube2t
bcl2
rad51b
atmin
ubb
crip1
cradd
epc2
ube2n
spred1
brip1
c10orf90
tnfrsf1a	-2.78048
ticrr	-2.51384
lyn	-2.00285
dtx3l	-2.4097
gnl1	-2.19747
atm
pnkp
taf9
bcl2a1	-2.26565
e2f7	-3.41381
rnf169	-2.30141
herc2
exo5
rif1
foxn3
pms2l2	-2.27108
rdm1
atrx
ei24
wrnip1
recql
ndrg1
pcbp4
paxip1
mad2l2
kiaa0101
aste1
huwe1	-2.35512
zfyve26	-2.13988
pole	-4.00713
hmox1
fmn2
xpa
c19orf40
tnp1
rad50
rad18
mpg
usp7
rnaseh2a	-2.29558
nfatc4
fem1b
h2afx	-2.08302
rbbp5
tdp1	-2.69931
ube2b
terf2
ash2l
alkbh2
ap5s1
bbc3	-2.46461
casp14
ccno
cdk2	-2.47623
cdkn2aip
cebpg	-3.0207
chaf1a	-3.35293
cry1	-2.25683
ddb1	-2.40853
fam175a	-3.83916
fancd2	-3.2123
fen1	-3.0867
gml	-3.12166
gtf2h2c	-2.08662
hipk1
kiaa1967	-2.05092
lig3	-2.35507
mael
mastl	-2.3889
mms22l	-2.61465
mum1	-2.22172
neil1	-3.1417
neil3
nek11	-2.00659
nhej1	-2.21814
nthl1	-2.31847
plk5
pms2	-2.1533
pole2	-3.73324
poll	-2.30914
rfc1	-2.71338
slc30a9	-2.25628
tonsl	-2.41496
ube2a
ube2e2	-2.21201
usp1
wrn	-2.40061
znf830
polr2a	-8.85656	-6.99705	Toxic
psmd14	-5.44831	-6.26415	Toxic
psmc5	-8.09297	-6.14462	Toxic
polr2b	-5.03816	-6.11798	Toxic
ccnd1	-11.6214	-5.85814	Toxic
psmd2	-6.45617	-5.78173	Toxic
bcl6	-5.81536	-5.66947	Toxic
rps27a	-6.17258	-5.44655	Toxic
psmc6	-7.06918	-5.37203	Toxic
psmc3	-7.83966	-5.36526	Toxic
psmc4	-7.10639	-5.26952	Toxic
psma4	-5.21017	-5.21526	Toxic
chek1	-6.58701	-5.14157	Toxic
psmd11	-6.38603	-5.05747	Toxic
psmd6	-7.42391	-5.0096	Toxic
polr2f	-5.47435	-4.93652	Toxic
psma1	-5.22107	-4.92939	Toxic
psmc2	-5.29687	-4.81902	Toxic
psmc1	-5.60229	-4.81203	Toxic
psmd8	-10.3041	-4.71292	Toxic
psmd7	-6.96167	-4.67437	Toxic
psmb3	-7.79334	-4.63551	Toxic
polr2d	-5.22768	-4.20355	Toxic
polr2h	-5.07277	-4.10121	Toxic
psmd3	-9.43287	-3.99634	Toxic
psmb6	-5.0394	-3.99284	Toxic
prkdc	-5.76428	-3.94648	Toxic
psmd12	-5.66662	-3.50733	Toxic
ubc	-11.8842	-3.31521	Toxic
psmd1	-12.8086	-3.21506	Toxic
cdk1	-6.46068	-2.38101	Toxic
